# Supplementary material
Source: PubMed Central journal article supplement (PMC4266588)

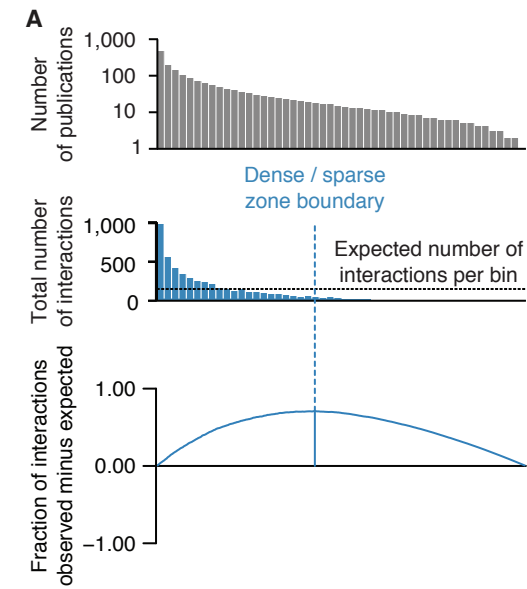

**B**

|                            | HI-II-14 | Lit-BM-13 | Co-Frac | PrePPI-HC |
|----------------------------|----------|-----------|---------|-----------|
| Nodes                      | 4,303    | 5,545     | 2,999   | 4,989     |
| Edges                      | 13,944   | 11,045    | 13,982  | 25,403    |
| Nodes in largest component | 4,100    | 4,919     | 2,820   | 3,681     |
| Average degree             | 6.348    | 3.772     | 9.324   | 10.183    |
| Average clustering         | 0.053    | 0.065     | 0.164   | 0.399     |
| Average distance           | 4.063    | 5.305     | 4.506   | 5.251     |
| Power law exponent         | 2.195    | 1.659     | 1.462   | 1.451     |

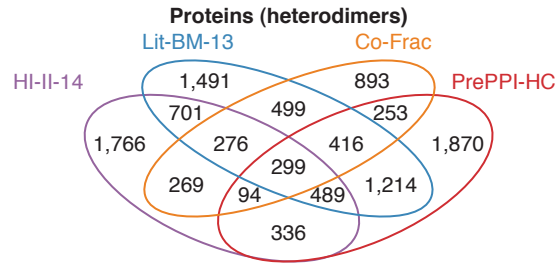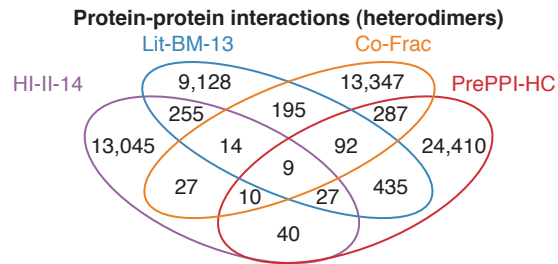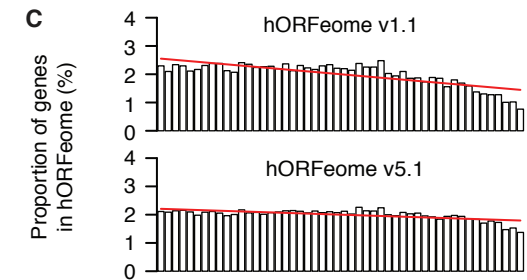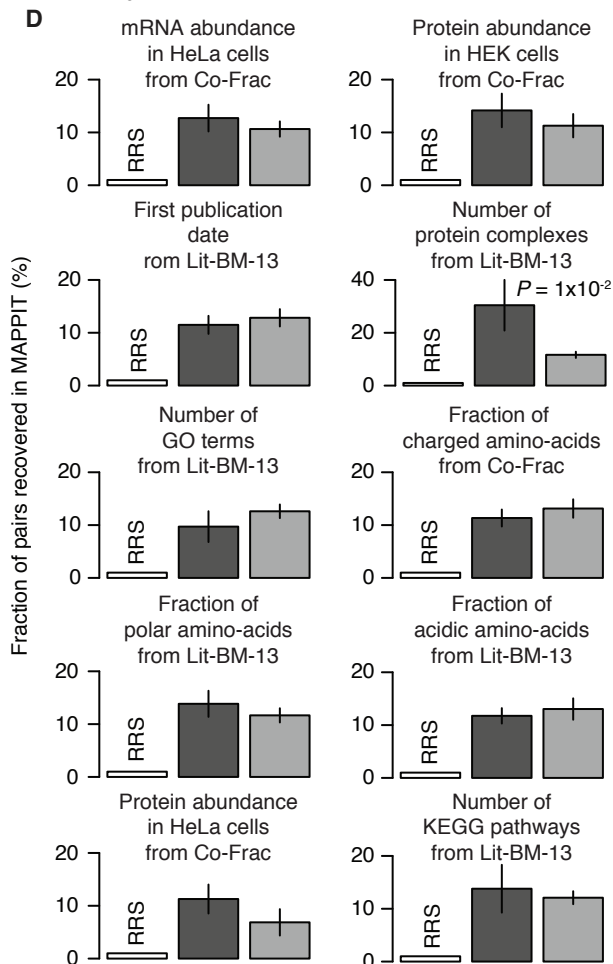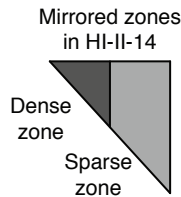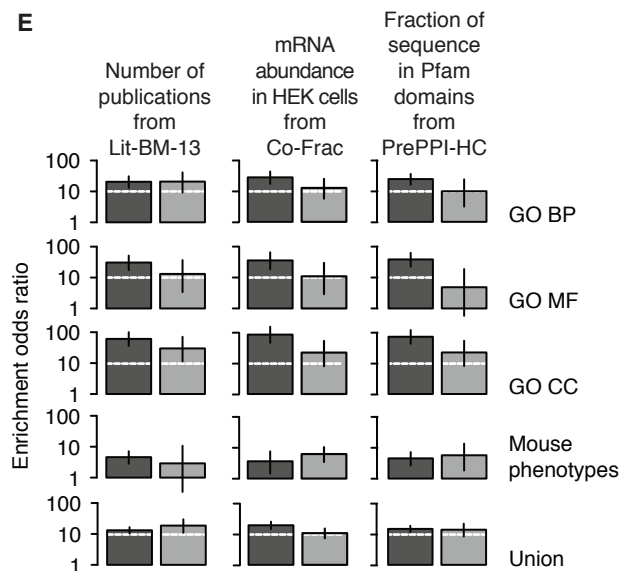

Supplement: NIHMS640363-supplement-4.pdf [file NIHMS640363-supplement-4.pdf]
