# Supplementary material
Source: PubMed Central journal article supplement (PMC4266588)

**A**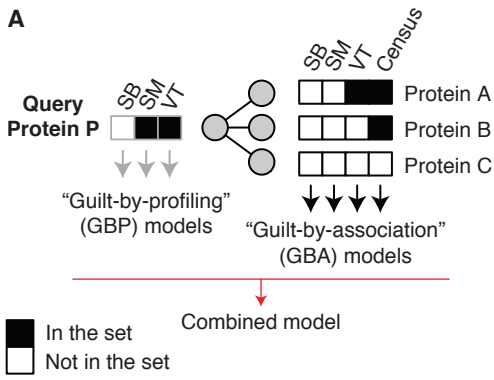

SB = Sleeping Beauty transposon-based mouse cancer screen  
 SM = Somatic mutations screen in cancer tissues  
 VT = Tumor virus host targets  
 Census = Sanger Cancer Gene Census

**C**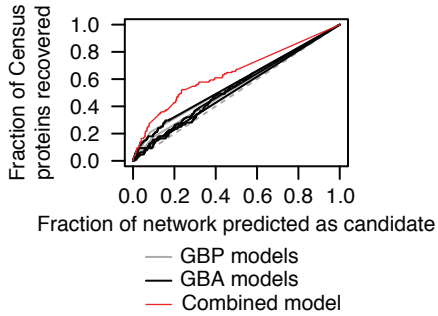**B**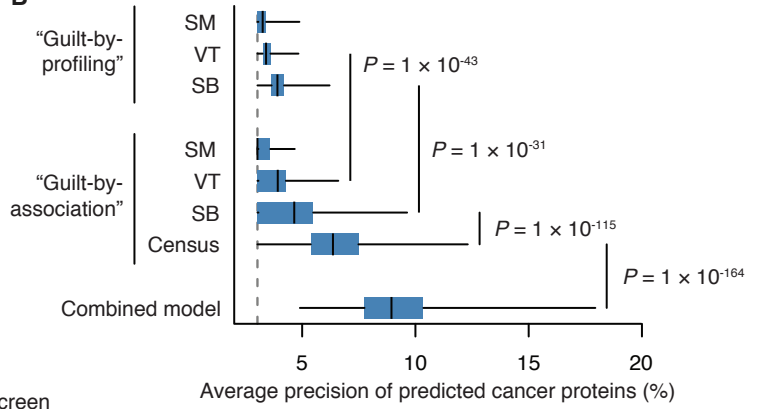**D**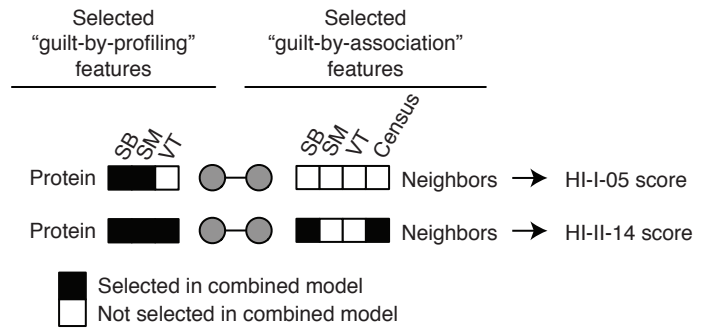

Supplement: NIHMS640363-supplement-6.pdf [file NIHMS640363-supplement-6.pdf]
