# Supplementary material
Source: PubMed Central journal article supplement (PMC4266588)

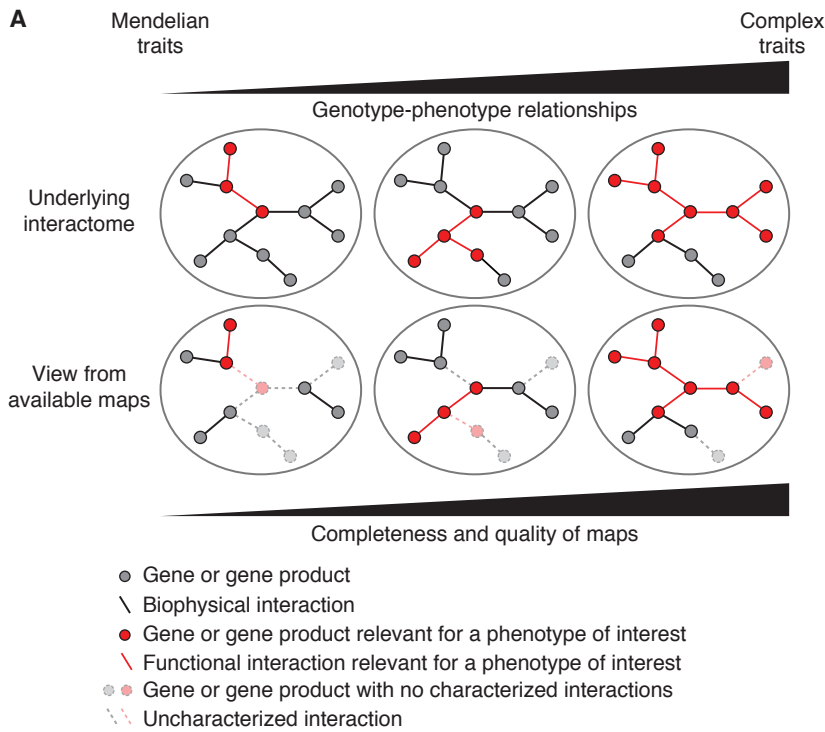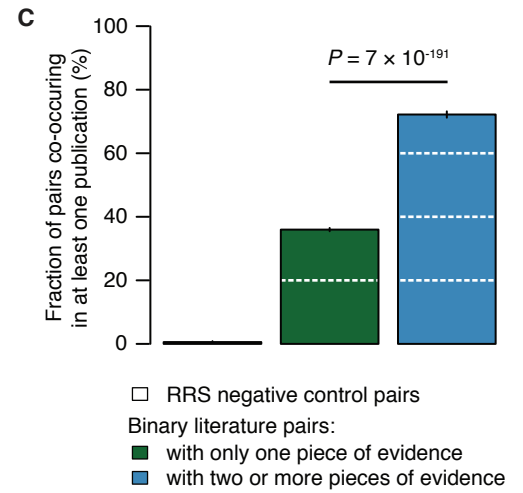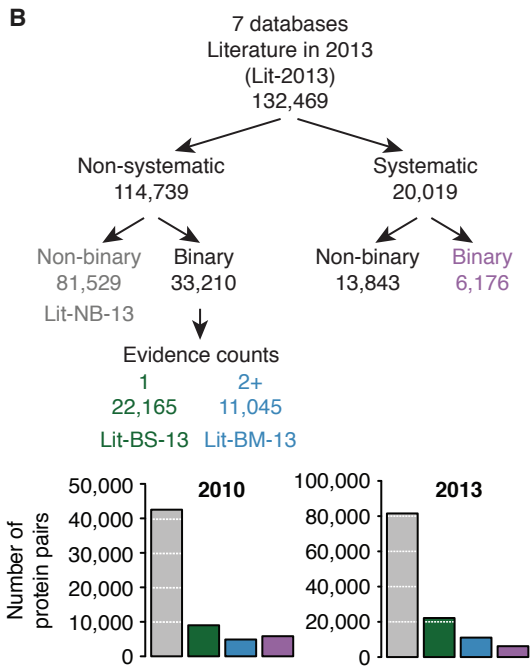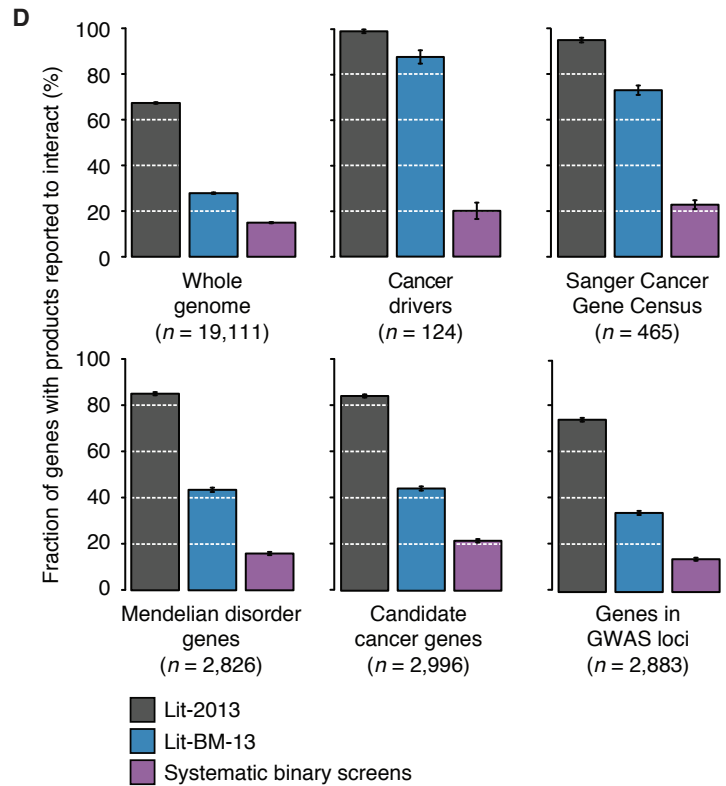

Supplement: NIHMS640363-supplement-1.pdf [file NIHMS640363-supplement-1.pdf]

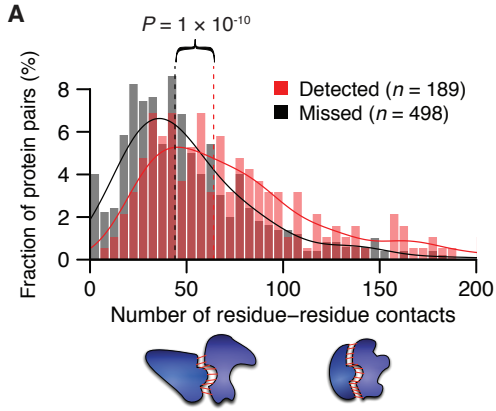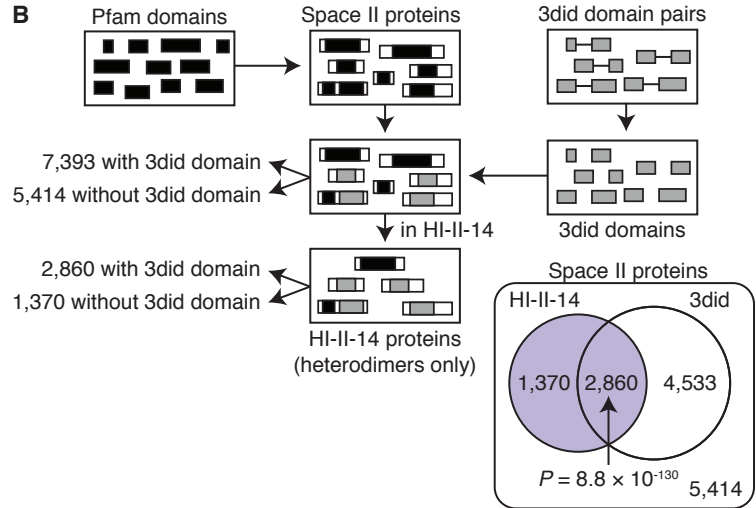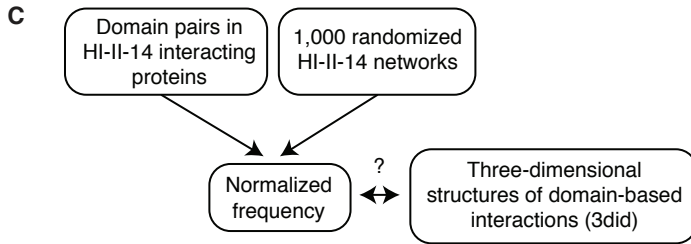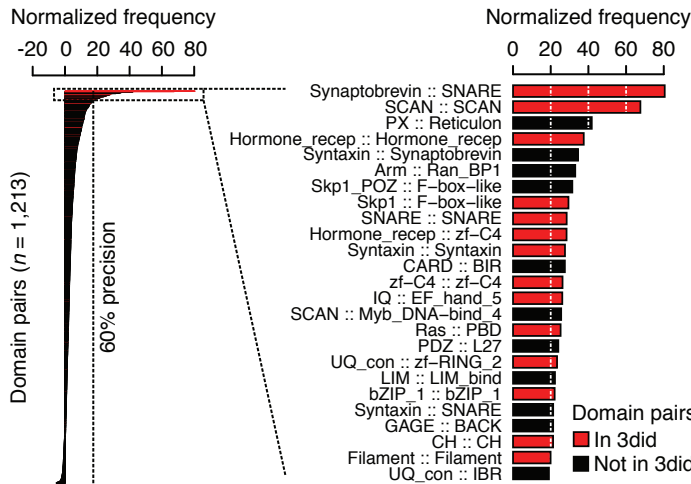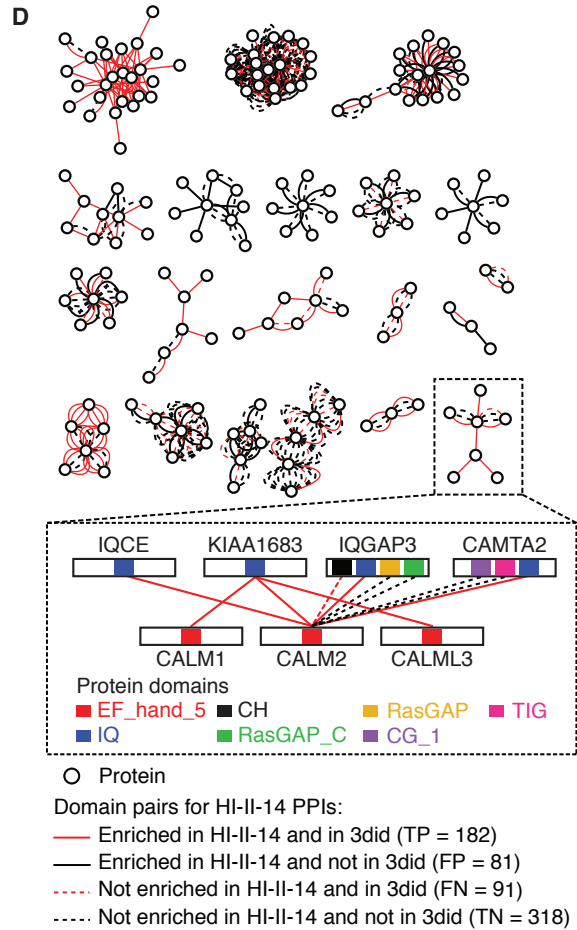

Supplement: NIHMS640363-supplement-2.pdf [file NIHMS640363-supplement-2.pdf]

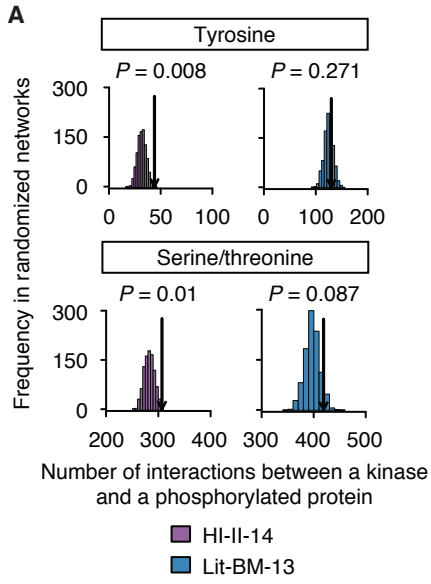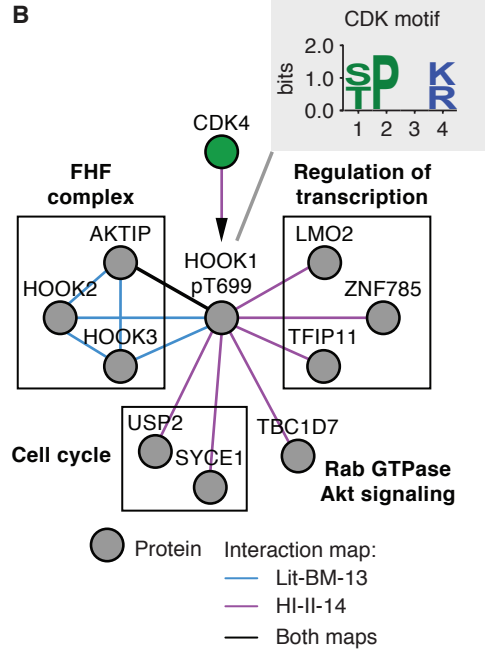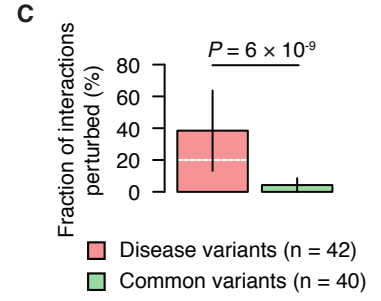

Supplement: NIHMS640363-supplement-3.pdf [file NIHMS640363-supplement-3.pdf]

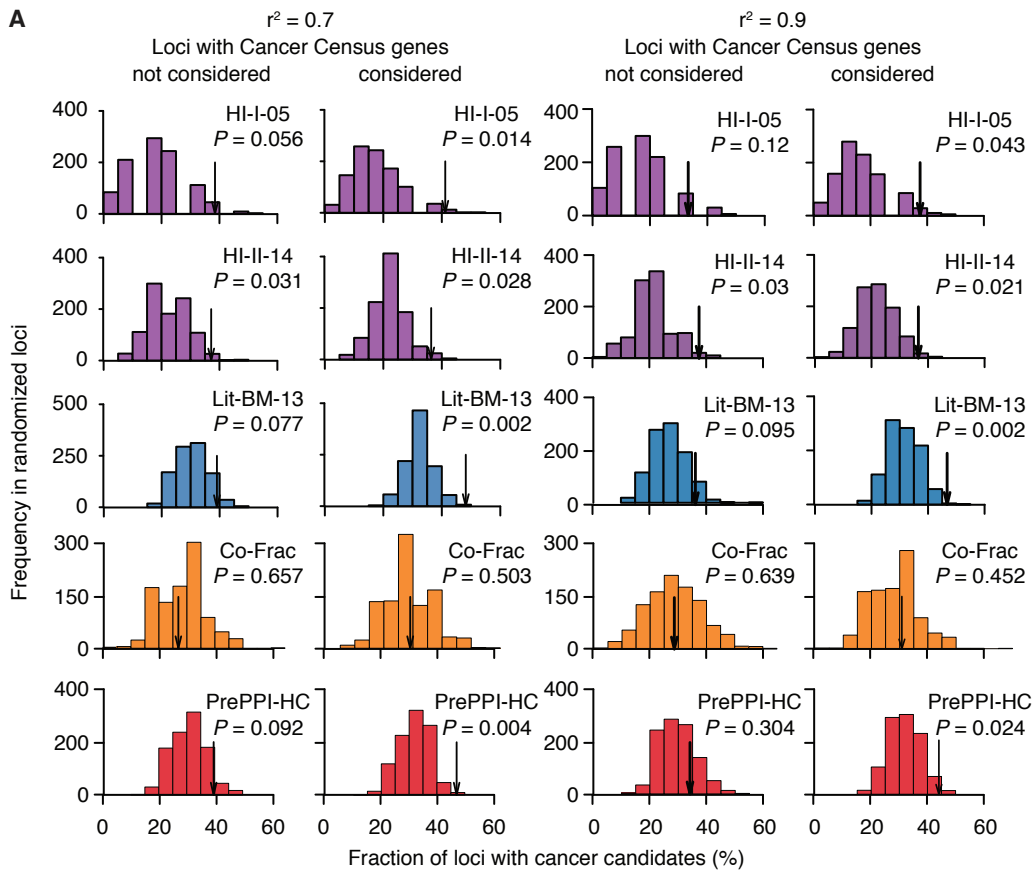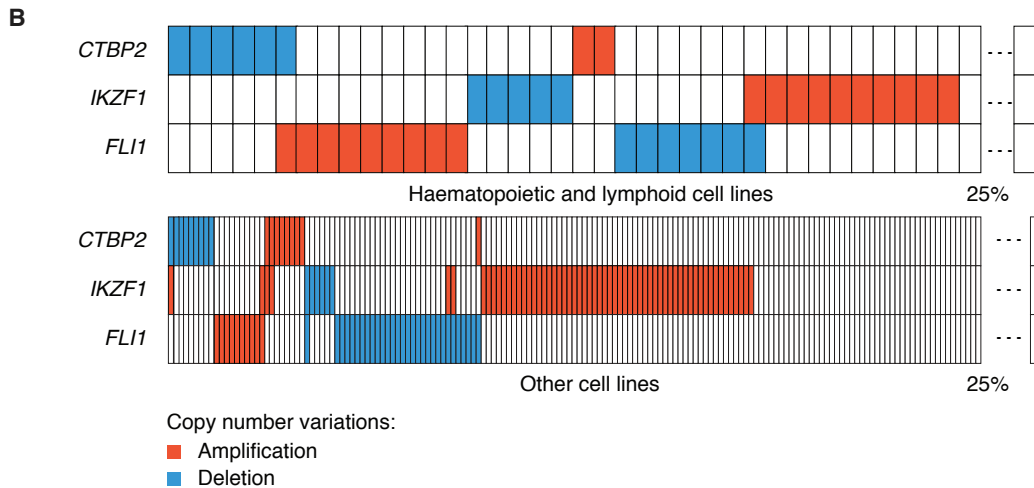

Supplement: NIHMS640363-supplement-5.pdf [file NIHMS640363-supplement-5.pdf]

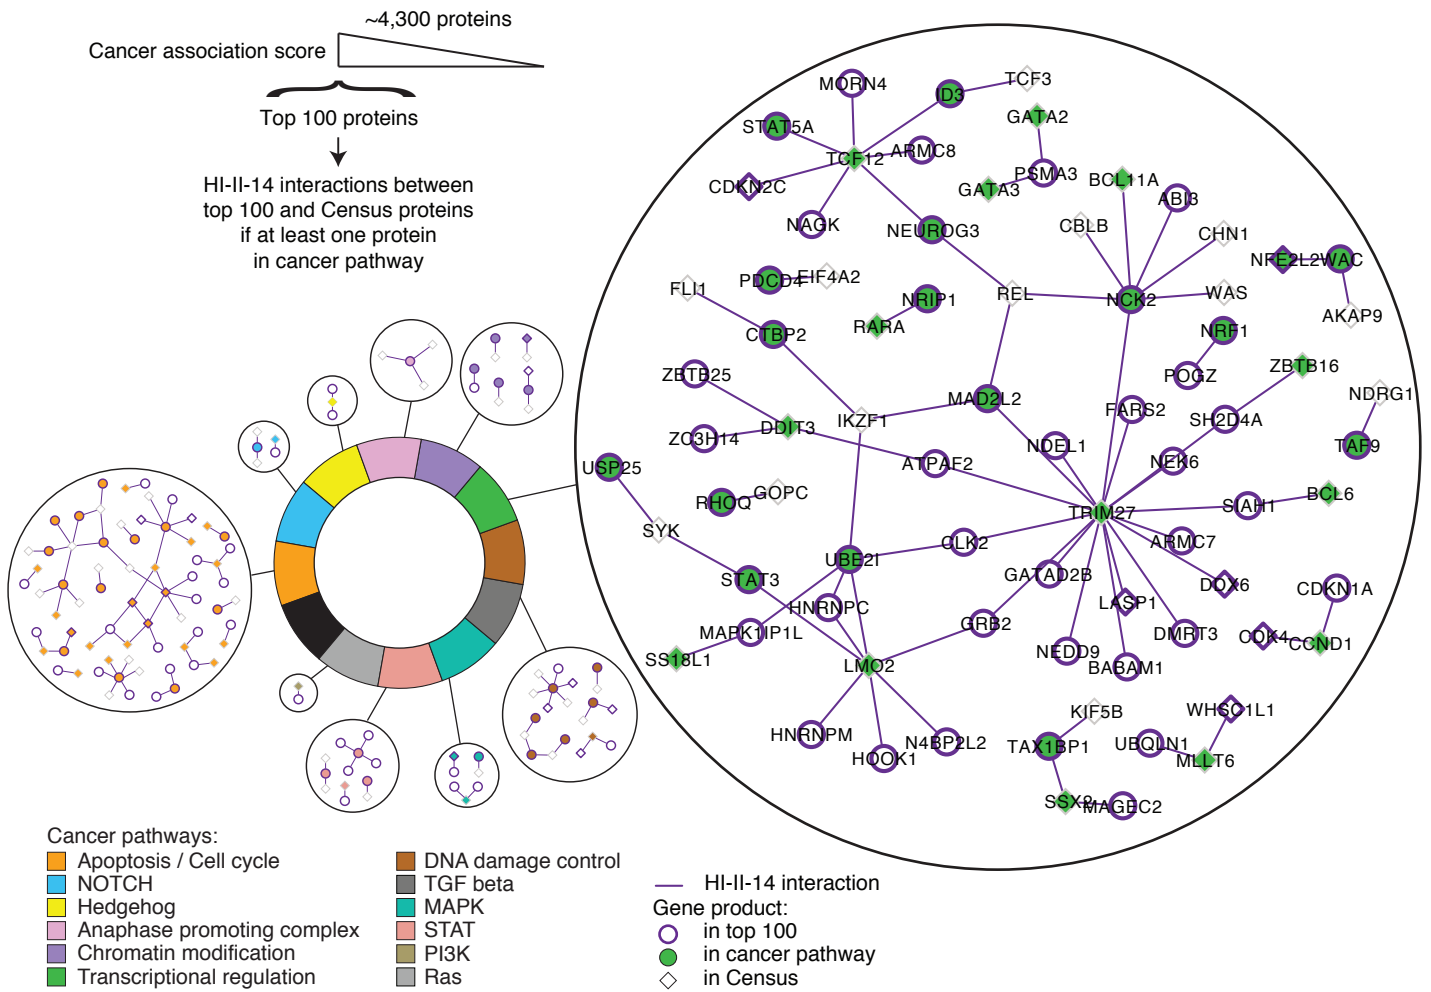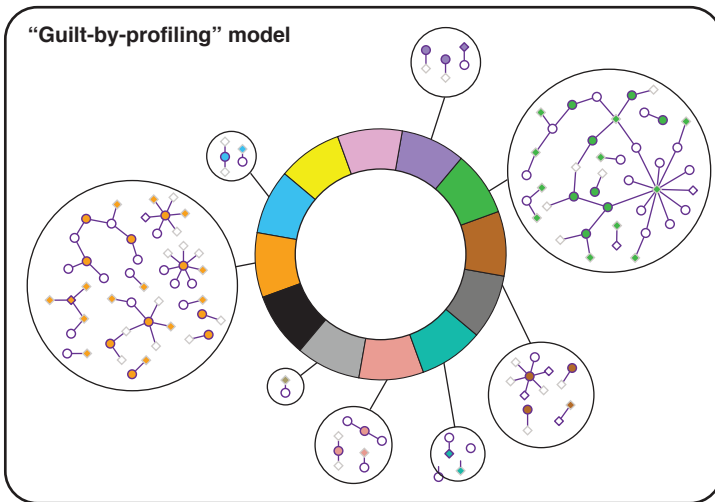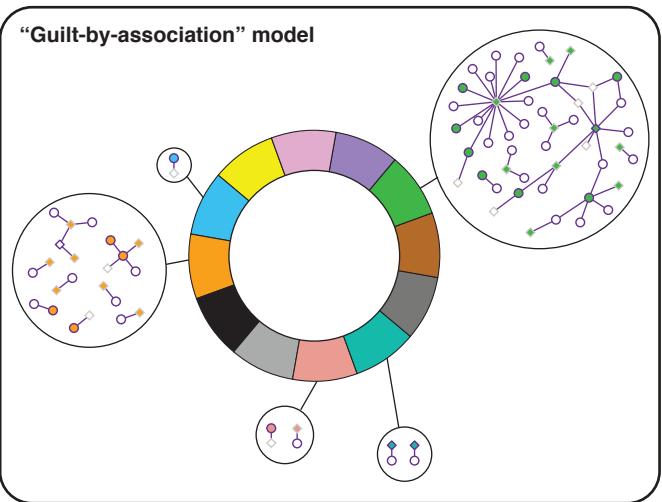

Supplement: NIHMS640363-supplement-7.pdf [file NIHMS640363-supplement-7.pdf]
